# Supplementary material for: Rational design of transition metal single-atom electrocatalysts: a simulation-based, machine learning-accelerated study
Source: Royal Society of Chemistry journal article supplement (doi:10.1039/d0ta06207c), 2020-01-01
Supplement: d0ta06207c1.pdf [file d0ta06207c1.pdf]

## Supporting Information

### **Rational design of transition metal single-atom electrocatalysts: A simulation-based, machine learning-accelerated study**

Lianping Wu †, Tian Guo †, Teng Li\*

*Department of Mechanical Engineering, University of Maryland, College Park, Maryland, USA  
20742*

†These authors contributed equally to this work

\* Corresponding author. E-mail: lit@umd.edu

#### **Table of Contents:**

**Supplementary Figures 1 to 3**

**Supplementary Table 1**

**Supplementary References**

## Supplementary Figures

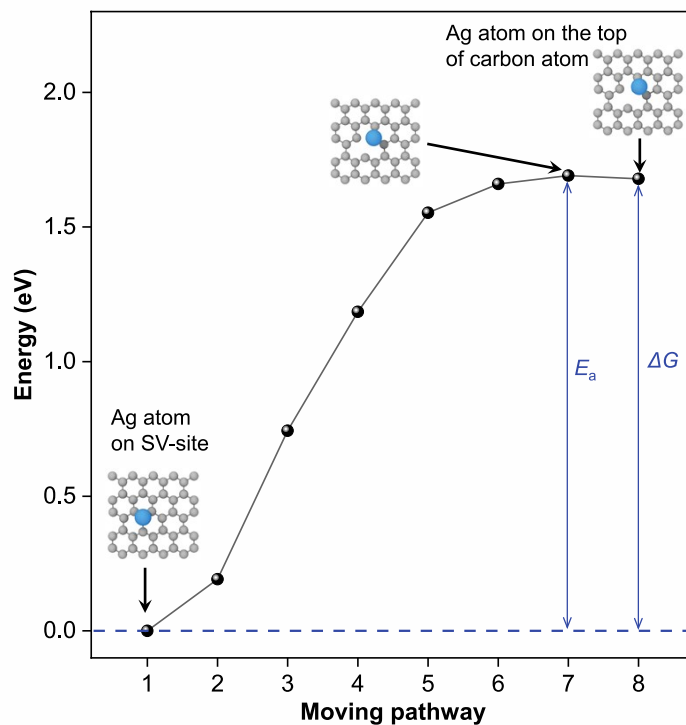

**Fig. S1** Energy variation of the system during the process of a Ag SA detaches from a SV-site and then lands on the top of the closest neighboring carbon atom. The inset images are the detailed moving path of the Ag SA from the SV-site to the top of closest neighboring carbon atom. As the Ag SA starts to detach from the SV-site, the energy increases and reaches a peak value when the SA is fully detached. The peak value defines the energy barrier  $E_a$  that the Ag SA has to overcome to leave the SV-site.  $\Delta G$  is the free-energy change for the Ag SA moving from the SV-site to the top of the closest neighboring carbon atom. The positive free-energy change indicates final state (Ag SA on the top of the closest neighboring carbon atom) is unstable comparing to the initial state (Ag SA on the SV-site). Thus, it is energetically unfavorable for the Ag SA to leave the SV-site.

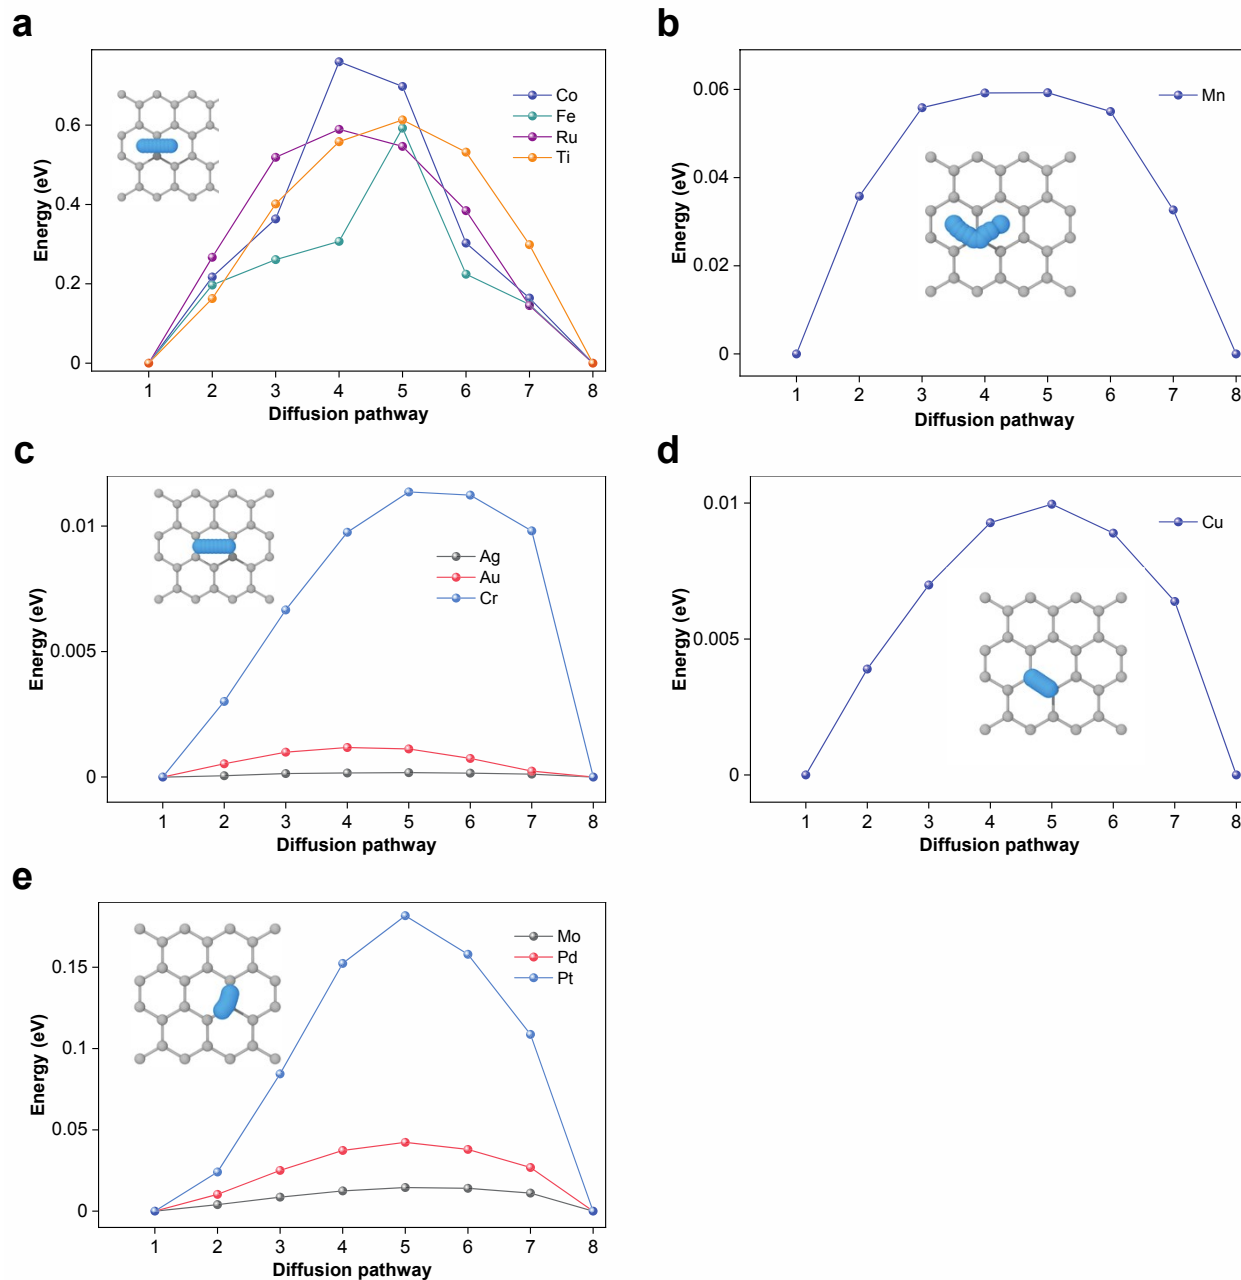

**Fig. S2** Energy variation of the system during the process of a metal SA diffuses on a defect-free carbon surface. The inset image depicts the detailed diffusion path of the metal SA on the carbon surface. The peak value defines the diffusion energy barrier as shown in Figure. 1b.

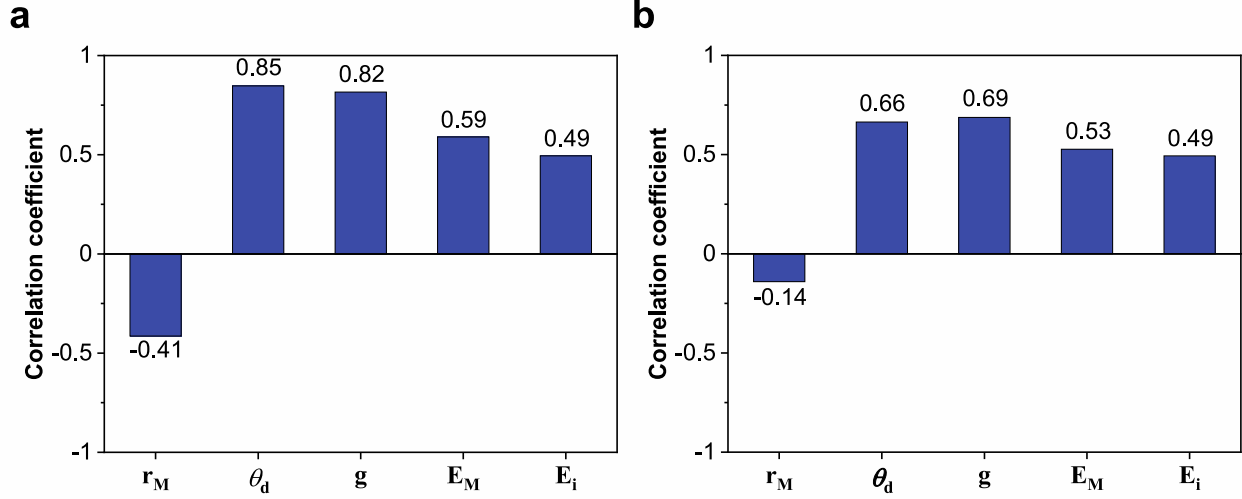

**Fig. S3 Pearson Correlation coefficients of ORR activities corresponding to atomic properties of elements.** **a**, Correlation coefficient of the five atomic properties of a SAC on a SV-site. **b**, Correlation coefficient of the five atomic properties of a SAC on a DV-site. The Pearson correlation coefficient is used to measure the strength of the correlation between two variables (i.e. the atomic parameters and the  $\eta^{ORR}$  in this work), where a correlation coefficient of a value of 1.0 means a perfect positive correlation, and a correlation coefficient of a value of -1.0 means a perfect negative correlation. <sup>1</sup> The Pearson correlation

coefficient,  $p_{X,Y}$ , can be calculated by 
$$p_{X,Y} = \frac{\sum (X_i - \bar{X})(Y_i - \bar{Y})}{\left[ \sum (X_i - \bar{X})^2 \sum (Y_i - \bar{Y})^2 \right]^{1/2}}$$
, where  $X_i$  and  $\bar{X}$  are one of the atomic parameters and their mean value, respectively, and  $Y_i$  and  $\bar{Y}$  are one of the  $\eta^{ORR}$  values and their mean value, respectively.

## Supplementary Table

**Table S1** Atomic parameters as inputs in the ML model. The first 14 elements (shaded in blue) are selected as the training/testing dataset for ML model, and  $\eta^{ORR}$  values of the last 15 elements (shaded in orange) are predicted by the best performing ML model.

| Element | Radius [pm] | <i>d</i> electron count | Group | Electronegativity | First ionization energy [eV] |
|---------|-------------|-------------------------|-------|-------------------|------------------------------|
| Ti      | 187         | 2                       | 4     | 1.54              | 6.578                        |
| V       | 179         | 3                       | 5     | 1.63              | 6.501                        |
| Cr      | 189         | 5                       | 6     | 1.66              | 6.524                        |
| Mn      | 197         | 5                       | 7     | 1.55              | 7.168                        |
| Fe      | 194         | 6                       | 8     | 1.83              | 7.591                        |
| Co      | 192         | 7                       | 9     | 1.88              | 7.581                        |
| Ni      | 163         | 8                       | 10    | 1.91              | 7.362                        |
| Cu      | 140         | 10                      | 11    | 1.90              | 7.450                        |
| Mo      | 209         | 5                       | 6     | 2.16              | 6.848                        |
| Ru      | 207         | 7                       | 8     | 2.20              | 7.103                        |
| Pd      | 202         | 8                       | 10    | 2.20              | 8.035                        |
| Ag      | 172         | 10                      | 11    | 1.93              | 7.305                        |
| Pt      | 209         | 9                       | 10    | 2.28              | 8.681                        |
| Au      | 166         | 10                      | 11    | 2.54              | 8.893                        |
| Sc      | 211         | 1                       | 3     | 1.22              | 6.861                        |
| Zn      | 139         | 10                      | 12    | 1.65              | 9.128                        |
| Y       | 219         | 1                       | 3     | 1.22              | 6.517                        |
| Zr      | 186         | 2                       | 4     | 1.33              | 6.597                        |
| Nb      | 207         | 4                       | 5     | 1.60              | 6.636                        |
| Tc      | 209         | 5                       | 7     | 1.90              | 7.020                        |
| Rh      | 195         | 8                       | 9     | 2.28              | 7.195                        |
| Cd      | 158         | 10                      | 12    | 1.69              | 8.728                        |
| Hf      | 212         | 2                       | 4     | 1.30              | 5.752                        |
| Ta      | 217         | 3                       | 5     | 1.50              | 7.601                        |
| W       | 210         | 4                       | 6     | 2.36              | 7.697                        |
| Re      | 2.17        | 5                       | 7     | 1.90              | 7.591                        |
| Os      | 216         | 6                       | 8     | 2.20              | 8.198                        |
| Ir      | 202         | 7                       | 9     | 2.20              | 8.681                        |
| Hg      | 209         | 10                      | 12    | 2.00              | 10.172                       |
| C       | 170         | 2                       | 6     | 2.55              | 11.560                       |

## Supplementary References

1. J. Lee Rodgers and W. A. Nicewander, *The American Statistician*, 1988, **42**, 59-66.
